# Supplementary material for: Validation of cardiac image-derived input functions for functional PET quantification
Source: Springer Nature journal article supplement (doi:10.1007/s00259-024-06716-8), 2024-04-27
Supplement: MOESM1 [file 27024516]

# Validation of cardiac image derived input functions for functional PET quantification

Murray Bruce Reed<sup>1,2</sup>, Patricia Anna Handschuh<sup>1,2</sup>, Clemens Schmidt<sup>1,2</sup>, Matej Murgaš<sup>1,2</sup>,  
David Gomola<sup>1,2</sup>, Christian Milz<sup>1,2</sup>, Sebastian Klug<sup>1,2</sup>, Benjamin Eggerstorfer<sup>1,2</sup>, Lisa  
Aichinger<sup>1,2</sup>, Godber Mathis Godbersen<sup>1,2</sup>, Lukas Nics<sup>3</sup>, Tatjana Traub-Weidinger<sup>3</sup>, Marcus  
Hacker<sup>3</sup>, Rupert Lanzenberger<sup>1,2#</sup>, Andreas Hahn<sup>1,2</sup>

<sup>1</sup>Department of Psychiatry and Psychotherapy, Medical University of Vienna, Austria

<sup>2</sup>Comprehensive Center for Clinical Neurosciences and Mental Health (C3NMH), Medical  
University of Vienna, Austria

<sup>3</sup>Department of Biomedical Imaging and Image-guided Therapy, Division of Nuclear  
Medicine, Medical University of Vienna, Vienna, Austria

## Supplementary Material

# Correspondence to:

Prof. Rupert Lanzenberger, MD, PD

Email: [rupert.lanzenberger@meduniwien.ac.at](mailto:rupert.lanzenberger@meduniwien.ac.at)

ORCID: <https://orcid.org/0000-0003-4641-9539>

Medical University of Vienna, Department of Psychiatry and Psychotherapy, Austria

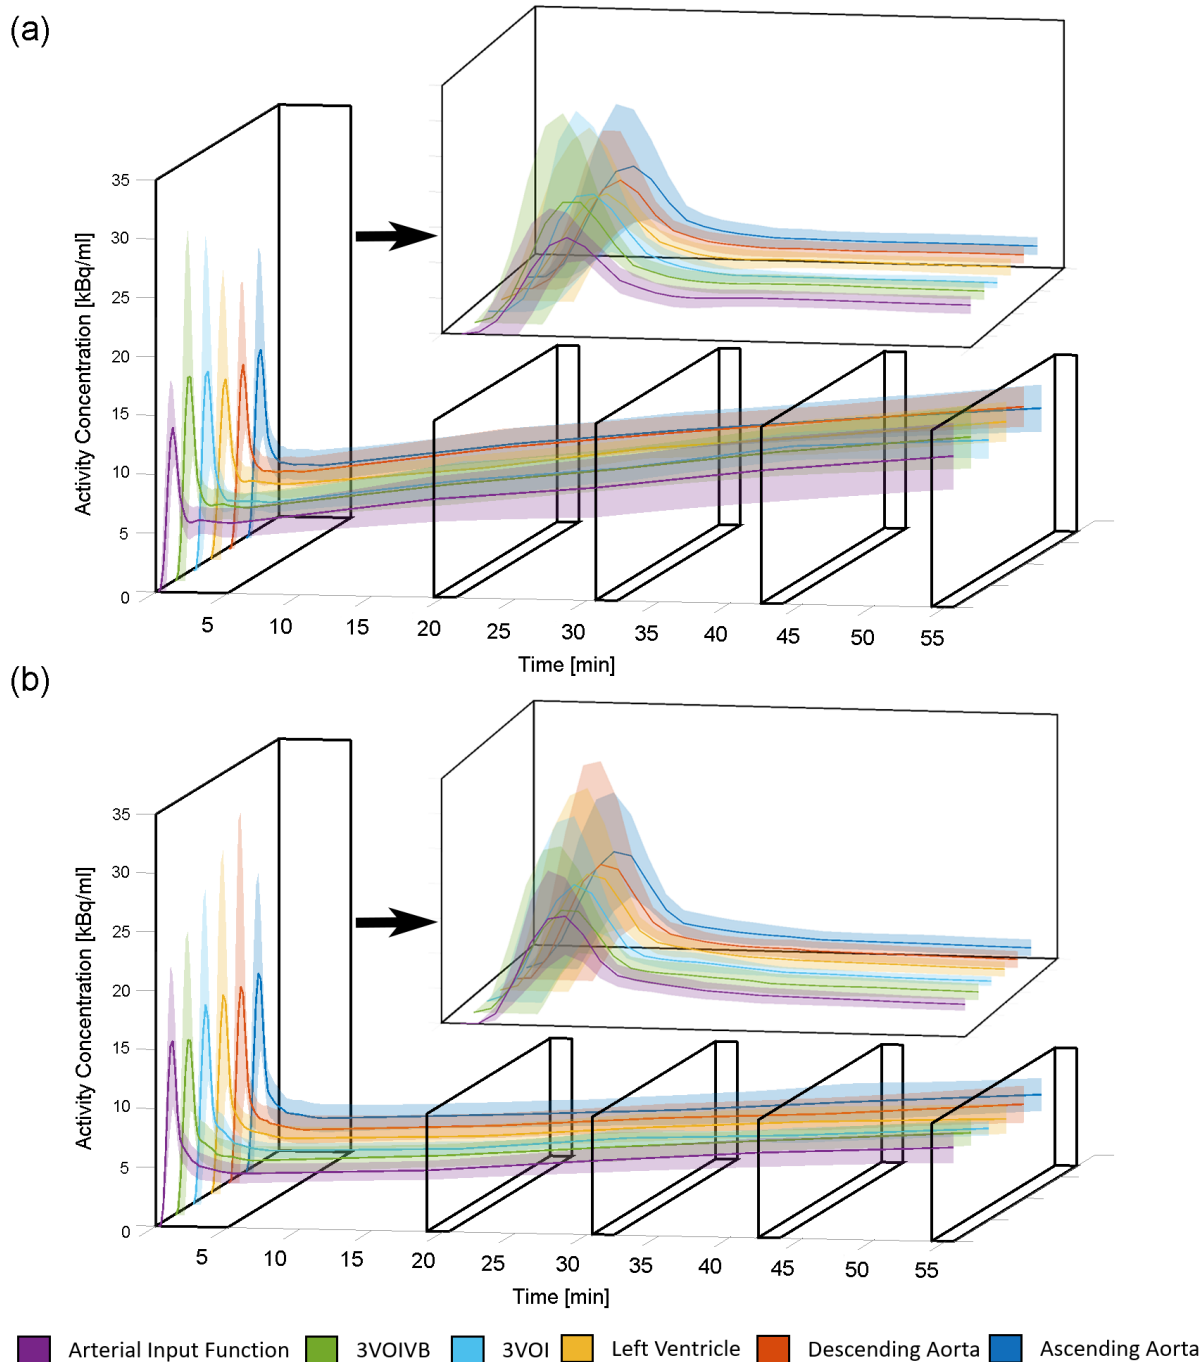

Supplementary Figure 1: Graphical overview of all input functions extracted using the larger VOIs. The mean and standard deviation of each input function's time course for the  $[^{18}\text{F}]\text{FDG}$  (a) and  $6\text{-}[^{18}\text{F}]\text{FDOPA}$  cohort (b). The top right inlay represents the first 5 minutes of the entire time course. The boxes indicate the times when the FOV was shuttled from the brain to the thorax to record the image-derived input function. All input functions display a similar peak. The arterial input function (AIF) peaks later than all image-derived input functions. Finally, both the 3VOI and 3VOIVB display the highest similarity to the AIF.

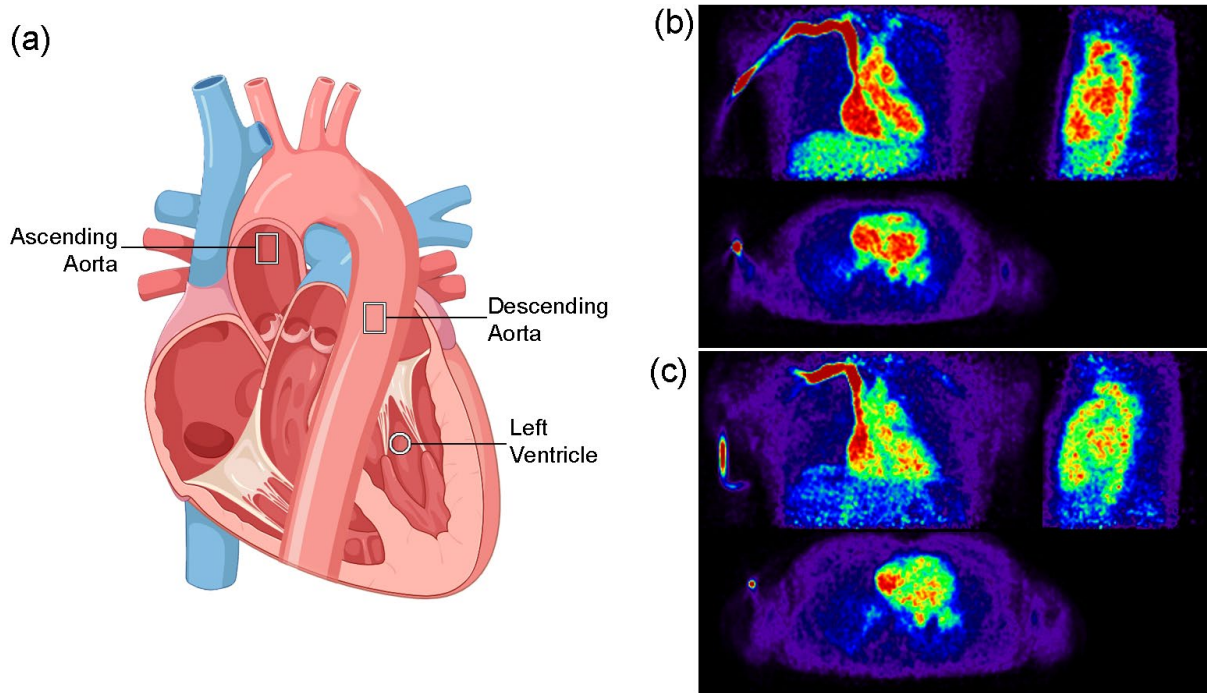

Supplementary Figure 2: (a) Illustrates the intended anatomical positioning of each volume of interest for extracting each image-derived input function. Here the center point was selected and the volume of interest was extracted programmatically. (b) Displays the summed PET thorax image of a single participant in the  $[^{18}\text{F}]\text{FDG}$  cohort, while (c) exhibits the summed image of a participant in the 6- $[^{18}\text{F}]\text{FDOPA}$  cohort.

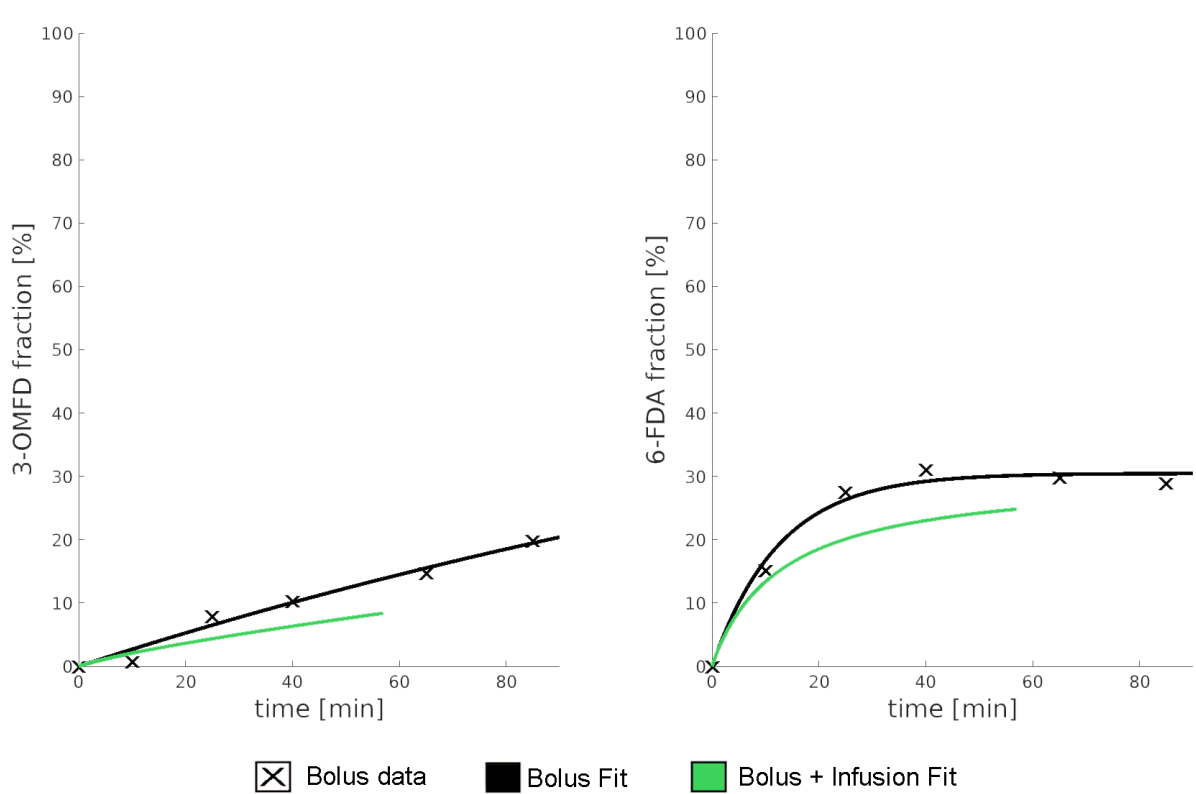

Supplementary Figure 3: The metabolite fractions (3-OMFD) and (6-FDA) were extracted from previous studies <sup>1,2</sup> and <sup>3</sup>, respectively (black crosses). These data points were then fitted with a single exponential function (black line) and adapted to match the bolus + infusion protocol (green line), showing the reduced metabolism with this protocol. The estimated bolus + infusion 6-FDA fraction data was combined with the individually measured plasma-to-whole-blood ratio to obtain the corrected arterial and image derived input functions. No corrections for the 3-OMFD fraction were done as participants received 150mg Carbidopa and 400mg Entacapone approximately 1 hour prior to tracer application to block the majority of the peripheral metabolism of 6-<sup>18</sup>F]FDOPA. Population based data extracted from <sup>3</sup>.

| Tracer         |           |           | [18F]FDG  |            |       |       |              | [18F]FDOPA |            |       |              |        |
|----------------|-----------|-----------|-----------|------------|-------|-------|--------------|------------|------------|-------|--------------|--------|
| Input Function |           |           | Asc Aorta | Desc Aorta | LV    | 3VOI  | 3VOIVB       | Asc Aorta  | Desc Aorta | LV    | 3VOI         | 3VOIVB |
| Brain Regions  | Accumbens | r         | 0.952     | 0.988      | 0.989 | 0.995 | <b>0.997</b> | 0.706      | 0.969      | 0.955 | <b>0.968</b> | 0.955  |
|                |           | Slope     | 2.22      | 1.11       | 1.38  | 1.03  | <b>0.99</b>  | 0.74       | 1.17       | 1.01  | 1.06         | 1.13   |
|                |           | Intercept | -2.14     | 0.15       | -0.44 | 0.30  | <b>0.26</b>  | <0.00      | <0.00      | <0.00 | <0.00        | <0.00  |
|                | Caudate   | r         | 0.913     | 0.982      | 0.975 | 0.991 | <b>0.995</b> | 0.734      | 0.964      | 0.950 | <b>0.964</b> | 0.948  |
|                |           | Slope     | 1.67      | 1.17       | 1.30  | 1.10  | <b>1.05</b>  | 0.79       | 1.17       | 1.01  | 1.00         | 1.07   |
|                |           | Intercept | -0.18     | 0.01       | -0.05 | 0.02  | <b>0.02</b>  | <0.00      | <0.00      | <0.00 | <0.00        | <0.00  |
|                | Putamen   | r         | 0.865     | 0.952      | 0.946 | 0.977 | <b>0.987</b> | 0.846      | 0.974      | 0.971 | <b>0.977</b> | 0.968  |
|                |           | Slope     | 2.05      | 1.16       | 1.39  | 1.06  | <b>1.03</b>  | 0.85       | 1.17       | 1.03  | 1.01         | 1.07   |
|                |           | Intercept | -0.25     | -0.01      | -0.07 | 0.03  | <b>0.02</b>  | <0.00      | <0.00      | <0.00 | <0.00        | <0.00  |
|                | Oldham*   | r         | 0.975     | 0.985      | 0.988 | 0.995 | <b>0.997</b> | -          | -          | -     | -            | -      |
|                |           | Slope     | 1.44      | 1.11       | 1.19  | 1.08  | <b>1.06</b>  | -          | -          | -     | -            | -      |
|                |           | Intercept | -0.23     | 0.06       | -0.03 | 0.07  | <b>0.03</b>  | -          | -          | -     | -            | -      |

Supplementary Table 1: Pearson correlation and regression analysis of task-induced [18F]FDG CMRGlu and 6-[18F]FDOPA Ki over all participants between the larger image-derived and arterial input functions. \*Cortical regions extracted from the Oldham meta-analysis of the monetary incentive delay task<sup>4</sup>. Bold values represent the best correlation for each tracer and region.

| Tracer            | Input Function | Brain Regions |         |         |           |         |
|-------------------|----------------|---------------|---------|---------|-----------|---------|
|                   |                | Cohen's d     | Caudate | Putamen | Accumbens | Oldham* |
| <b>[18F]FDG</b>   | Asc Aorta      | 0.19          | 0.369   | 0.097   | 0.084     | 0.219   |
|                   | Desc Aorta     | 0.18          | 0.089   | <0.009  | <0.002    | 0.091   |
|                   | Left Ventricle | 0.114         | 0.407   | 0.023   | <0.007    | 0.131   |
|                   | 3VOIF          | 0.151         | 0.025   | <0.001  | <0.000    | 0.021   |
|                   | 3VOIFVB        | 0.930         | 0.012   | <0.003  | <0.000    | 0.040   |
| <b>[18F]FDOPA</b> | Asc Aorta      | 0.55          | 0.303   | 0.140   | 0.104     | N/A     |
|                   | Desc Aorta     | 0.54          | 0.064   | <0.002  | <0.001    | N/A     |
|                   | Left Ventricle | 0.59          | 0.045   | 0.060   | 0.014     | N/A     |
|                   | 3VOIF          | 0.690         | <0.003  | <0.001  | <0.000    | N/A     |
|                   | 3VOIFVB        | 0.480         | <0.000  | <0.000  | <0.000    | N/A     |

Supplementary Table 2: Overview of equivalency test results estimated for regional task-induced net influx rates ( $K_i$ ) quantified using each image derived-input function extracted from the larger VOIs and arterial input function (significance indicates equivalence). Cohen's  $d$  represents the standardized mean difference between the AIF and each IDIF. \*Cortical regions extracted from the Oldham meta-analysis of the monetary incentive delay task <sup>4</sup>.

| Tracer            | Input Function | Cohen's d | Brain Regions |            |            |            |            |            |            |            |
|-------------------|----------------|-----------|---------------|------------|------------|------------|------------|------------|------------|------------|
|                   |                |           | Caudate       |            | Putamen    |            | Accumbens  |            | Oldham*    |            |
|                   |                |           | p-value(1)    | p-value(2) | p-value(1) | p-value(2) | p-value(1) | p-value(2) | p-value(1) | p-value(2) |
| <b>[18F]FDG</b>   | Asc Aorta      | 0.19      | 0.22          | 0.05       | 0.19       | <0.00      | 0.16       | <0.00      | 0.07       | 0.17       |
|                   | Desc Aorta     | 0.18      | 0.04          | <0.00      | 0.01       | <0.00      | <0.00      | <0.00      | 0.39       | 0.37       |
|                   | Left Ventricle | 0.11      | 0.04          | 0.01       | 0.05       | <0.00      | 0.02       | <0.00      | 0.26       | 0.31       |
|                   | 3VOIF          | 0.33      | <0.00         | <0.00      | <0.00      | <0.00      | <0.00      | <0.00      | 0.09       | 0.06       |
|                   | 3VOIFVB        | 0.22      | <0.00         | <0.00      | 0.01       | <0.00      | <0.00      | <0.00      | 0.12       | 0.09       |
| <b>[18F]FDOPA</b> | Asc Aorta      | 0.55      | 0.09          | 0.23       | 0.47       | 0.41       | 0.46       | 0.36       | N/A        | N/A        |
|                   | Desc Aorta     | 0.54      | 0.08          | 0.04       | <0.00      | <0.00      | <0.00      | <0.00      | N/A        | N/A        |
|                   | Left Ventricle | 0.59      | 0.33          | 0.31       | 0.01       | <0.00      | 0.01       | <0.00      | N/A        | N/A        |
|                   | 3VOIF          | 0.69      | 0.30          | 0.27       | <0.00      | <0.00      | <0.00      | <0.00      | N/A        | N/A        |
|                   | 3VOIFVB        | 0.05      | 0.26          | 0.21       | <0.00      | <0.00      | <0.00      | <0.00      | N/A        | N/A        |

Supplementary Table 1: Overview of equivalency test results estimated for task-specific CMRglu ( $[^{18}\text{F}]\text{FDG}$ ) or regional net influx rates ( $\text{Ki}$ , 6- $[^{18}\text{F}]\text{FDOPA}$ ) quantified using each image derived-input function and arterial input function (significance of both p-value(1) and p-value(2) indicates equivalence). Cohen's d represents the standardized mean difference between the AIF and each IDIF. The p-value(1) and p-value(2) represent the left and right one-sided t-test significance values from the two one-sided t-tests (TOST) for each region, respectively. Bold IDIFs show equivalence for all regions of interest. \*Cortical regions extracted from the Oldham meta-analysis of the monetary incentive delay task <sup>4</sup>.

## References

1. Doudet DJ, Chan GL, Jivan S, et al. Evaluation of dopaminergic presynaptic integrity: 6-[18F]fluoro-L-dopa versus 6-[18F]fluoro-L-m-tyrosine. *J Cereb Blood Flow Metab.* Mar 1999;19(3):278-87. doi:10.1097/00004647-199903000-00006
2. Huang SC, Yu DC, Barrio JR, et al. Kinetics and modeling of L-6-[18F]fluoro-dopa in human positron emission tomographic studies. *J Cereb Blood Flow Metab.* Nov 1991;11(6):898-913. doi:10.1038/jcbfm.1991.155
3. Ishikawa T, Dhawan V, Chaly T, et al. Fluorodopa positron emission tomography with an inhibitor of catechol-O-methyltransferase: effect of the plasma 3-O-methyldopa fraction on data analysis. *J Cereb Blood Flow Metab.* Sep 1996;16(5):854-63. doi:10.1097/00004647-199609000-00010
4. Oldham S, Murawski C, Fornito A, Youssef G, Yücel M, Lorenzetti V. The anticipation and outcome phases of reward and loss processing: A neuroimaging meta-analysis of the monetary incentive delay task. *Hum Brain Mapp.* Aug 2018;39(8):3398-3418. doi:10.1002/hbm.24184
